# Supplementary material for: Poly(l-lactide-co-caprolactone-co-glycolide)-Based Nanoparticles as Delivery Platform: Effect of the Surfactants on Characteristics and Delivery Efficiency
Source: MDPI journal article supplement (doi:10.3390/nano12091550), 2022-05-03
Supplement: s1 [file s1]

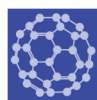

# Poly(L-Lactide-co-Caprolactone-co-Glycolide)-Based Nanoparticles as Delivery Platform: Effect of the Surfactants on Characteristics and Delivery Efficiency

Magda M. Rebanda <sup>1,2</sup>, Simona Bettini <sup>3</sup>, Laura Blasi <sup>1,4</sup>, Antonio Gaballo <sup>1</sup>, Andrea Ragusa <sup>1,3</sup>, Alessandra Quarta <sup>1,\*</sup> and Clara Piccirillo <sup>1,\*</sup>

<sup>1</sup> CNR Nanotec, Institute of Nanotechnology, Campus Ecotekne, Via Monteroni, 73100 Lecce, Italy; magda.rebanda@hotmail.com (M.M.R.); laura.blasi@cnr.it (L.B.); antonio.gaballo@nanotec.cnr.it (A.G.); andrea.ragusa@unisalento.it (A.R.)

<sup>2</sup> Laboratório Associado, CBQF – Centro de Biotecnologia e Química Fina, Escola Superior de Biotecnologia, Universidade Católica Portuguesa, 4169-005 Porto, Portugal

<sup>3</sup> Department of Biological and Environmental Sciences and Technologies, University of Salento, Via Monteroni, 73100 Lecce, Italy; simona.bettini@unisalento.it

<sup>4</sup> Institute for Microelectronics and Microsystems, Campus Ecotekne, Via Monteroni, 73100 Lecce, Italy

\* Correspondence: alessandra.quarta@nanotec.cnr.it (A.Q.); clara.piccirillo@nanotec.cnr.it (C.P.)

## List of abbreviations:

AFM—Atomic force microscope

CTAB—Cetrimonium bromide

DCF—Dichlorofluorescein

DCFH—2',7'-dichlorodihydrofluorescein

DCFH-DA—2',7'-dichlorofluorescein diacetate

DDS—Drug Delivery System

DLS—Dynamic light scattering

DMEM—Dulbecco's Modified Eagle's Medium

DMSO—Dimethyl sulphoxide

DNA—Deoxyribonucleic acid

DOXO—Doxorubicin

EDTA—Ethylenediamine tetraacetic acid

EE—Encapsulation Efficiency

FBS—Serum fetal bovine

FDA—Food and Drug Administration

FTIR—Fourier Transform Infrared

LC—Loading Capacity

MCF7—Michigan Cancer Foundation-7

MTT—Tetrazolium salt Thiazolyl blue

NC-AFM—Non-contact mode AFM

NP(s)—Nanoparticle(s)

PBS—Phosphate-buffered saline

PCL—Poly-ε-caprolactone

PDI—Polydispersity index

PEG—Polyethylene glycol

PLA—Poly(L-lactic) acid

PLCG—Poly(L-lactide-co-caprolactone-co-glycolide)

PLGA—Poly(lactic-co-glycolic) acid

PVA—Poly(vinyl alcohol)

RE—Release Efficiency

RIPA—radioimmunoprecipitation assay

TGA—Thermogravimetric analysis

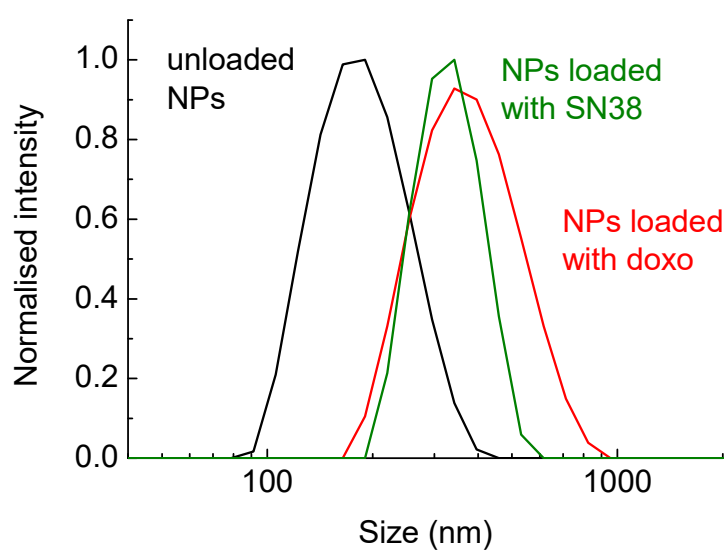

**Figure S1.** DLS data for NPs prepared using PVA/dextran as surfactants, both empty and loaded with DOXO.

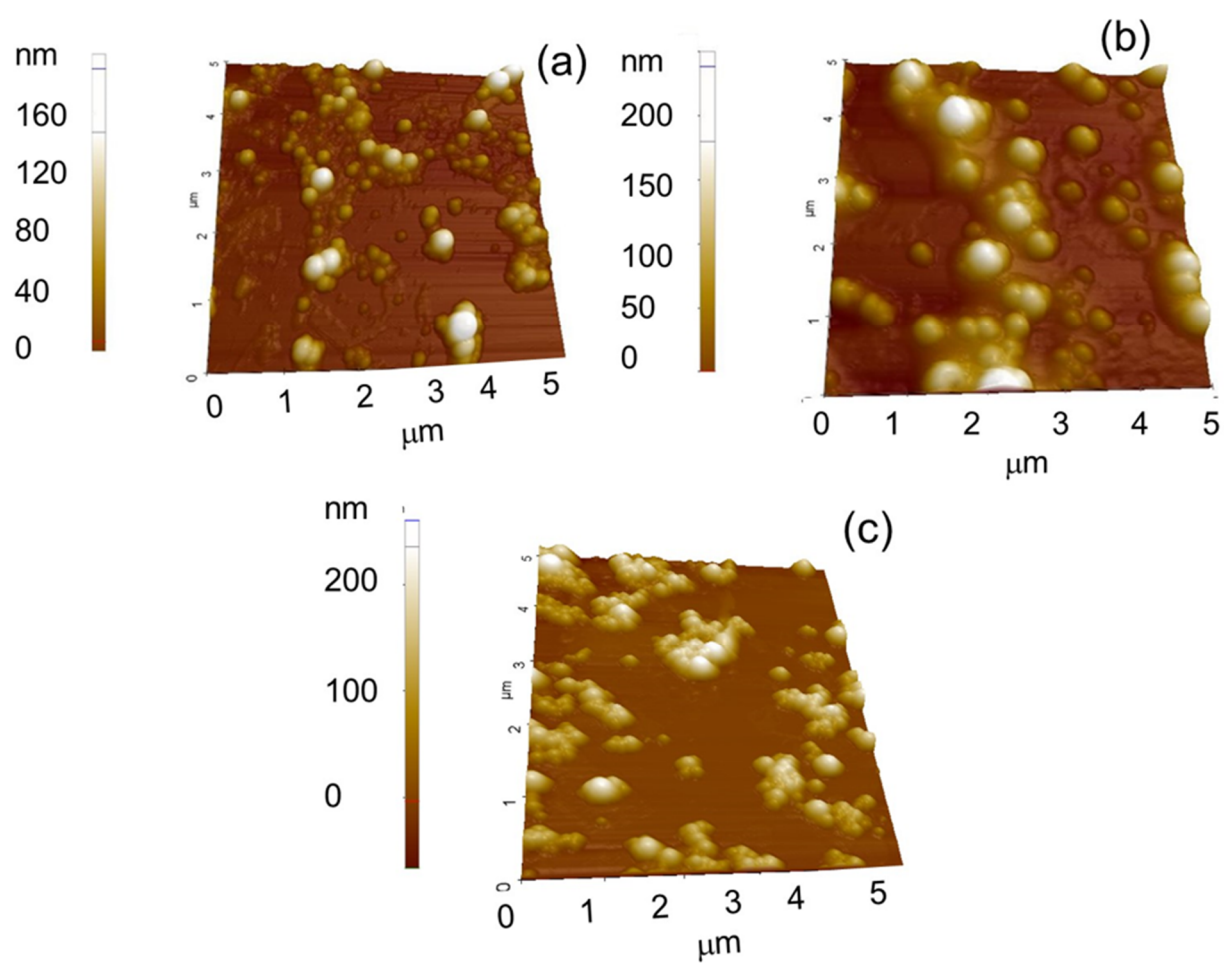

**Figure S2.** AFM micrographs for three types of NPs. (a) PVA, (b) DEX, (c) PVA/DEX.

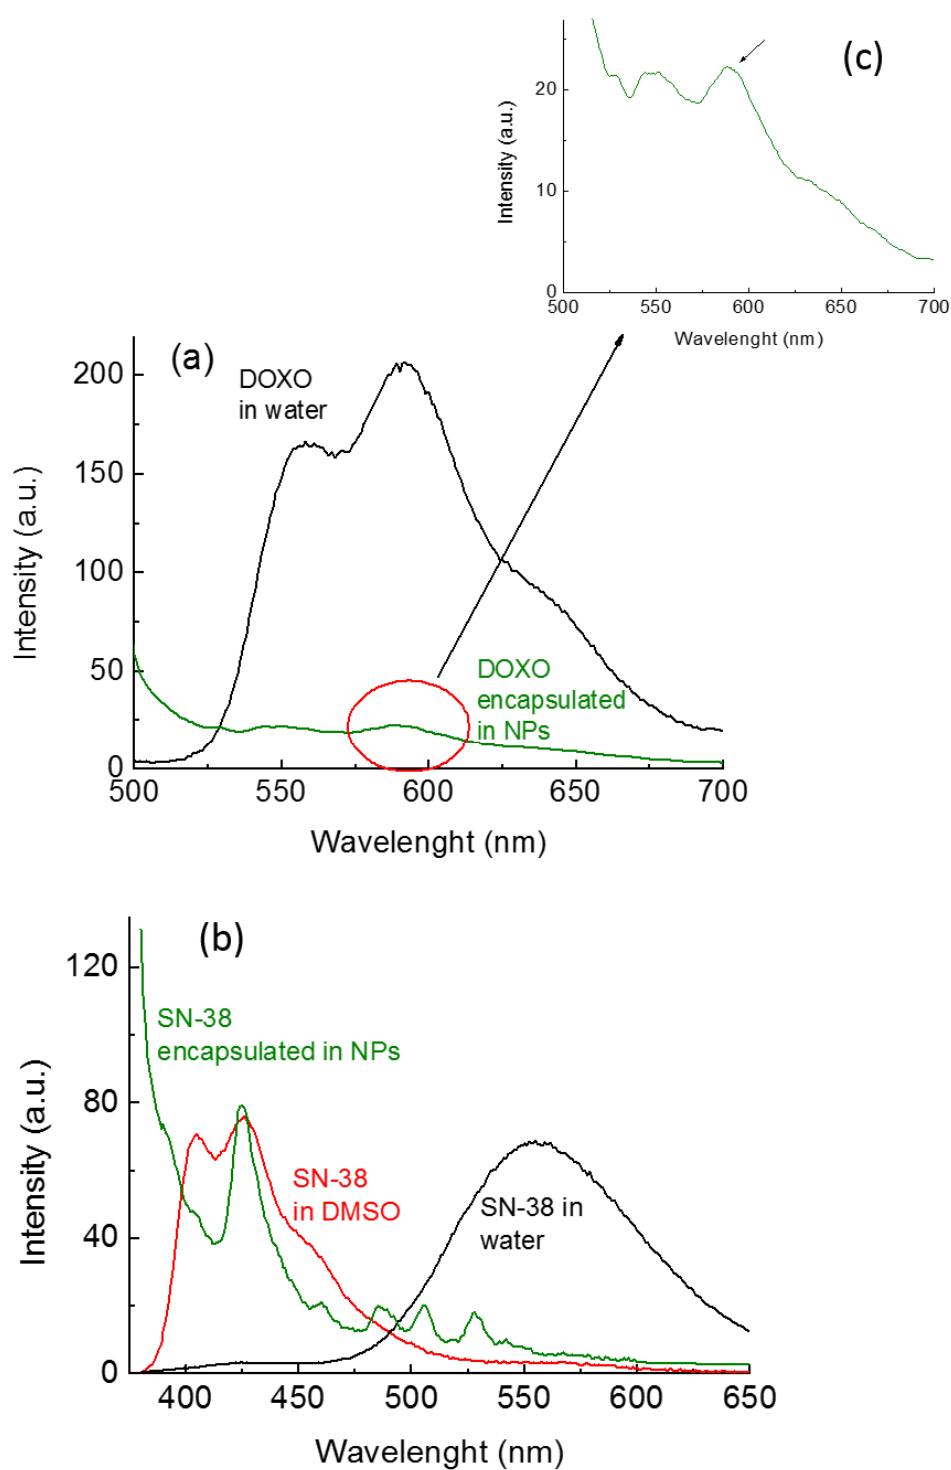

**Figure S3.** (a) Fluorescence spectra of free DOXO (black curve) and DOXO encapsulated into the NPs prepared with PVA/dextran (green curve), excitation wavelength 488 nm. (b) Fluorescence spectra of free SN-38 dissolved in DMSO and water (black and red curves) and of the drug encapsulated into the NPs prepared with PVA/DEX (green curve), excitation wavelength 370 nm. (c) The inset reports the curve of the encapsulated DOXO shown in (a) scaled up to show the two typical peaks of DOXO. The systems prepared with other surfactants showed similar features (data not shown).

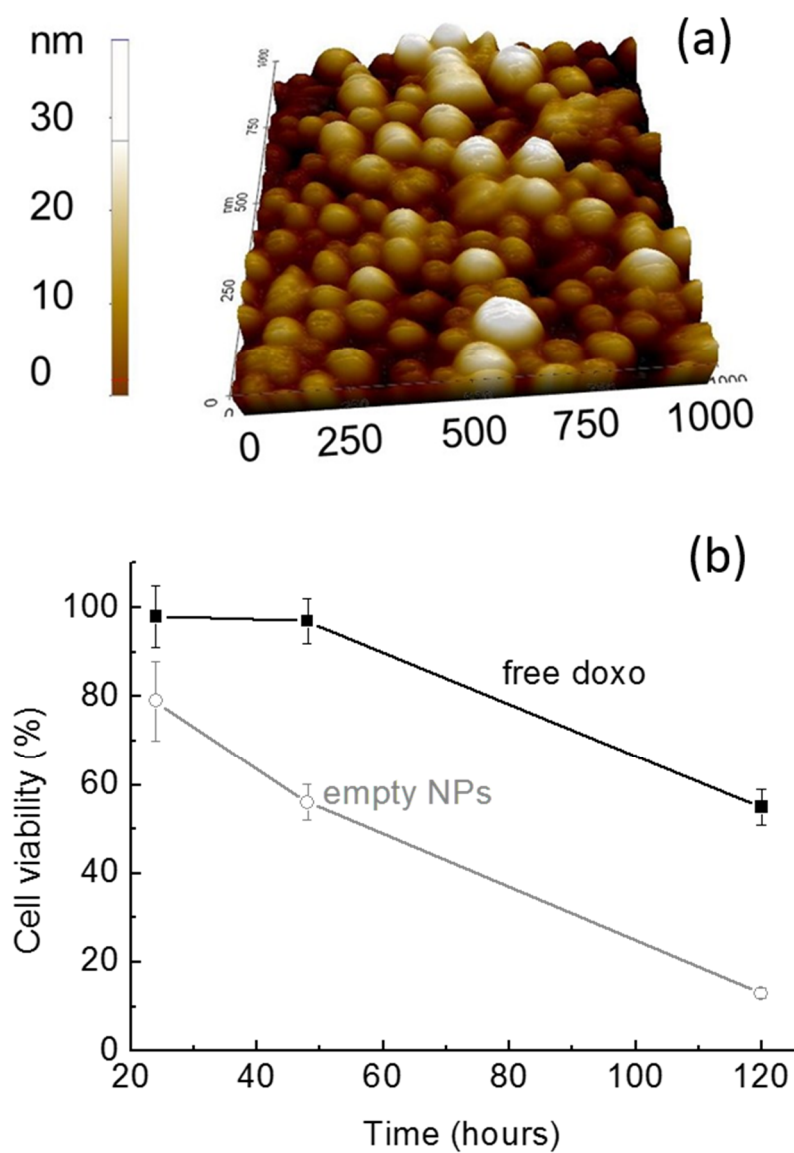

**Figure S4.** (a) AFM image and (b) cell viability for NPs prepared using CTAB as surfactant agent.

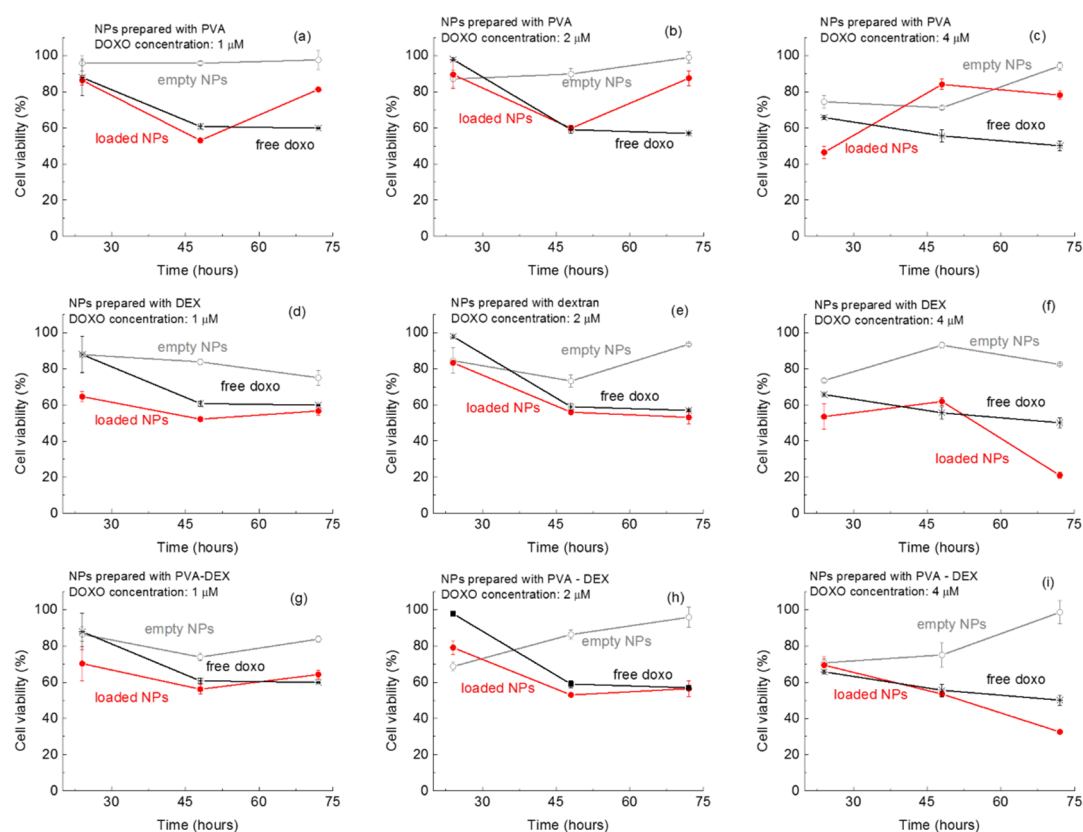

**Figure S5.** MTT viability tests of MCF7 cells incubated with the NPs coated with (a–c) PVA; (d–f) DEX and (g–i) PVA/DEX and loaded with DOXO. Three drug concentrations (1, 2 and 4  $\mu\text{M}$ ) and three time points (24, 48 and 72 h) were considered. The drug concentration points correspond to NP amounts ranging from 50 to 112  $\mu\text{g}$ .

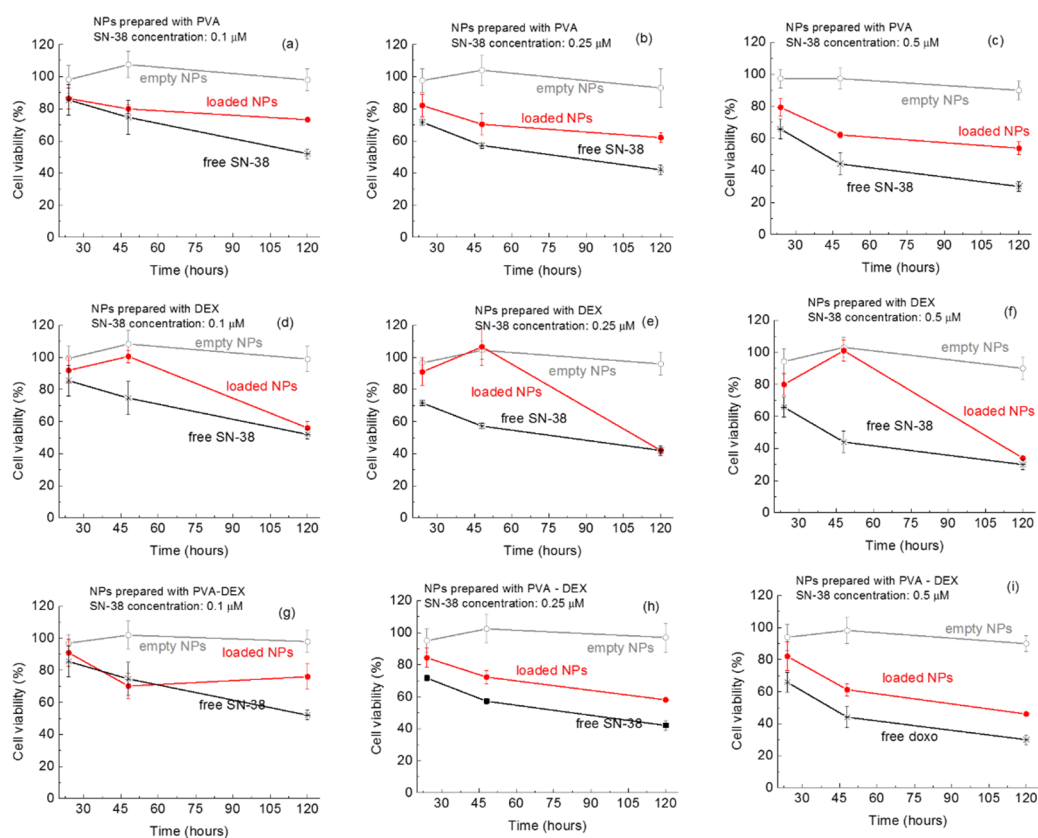

**Figure S6.** MTT viability tests of MCF7 cells incubated with the NPs coated with (a–c) PVA; (d–f) DEX and (g–i) PVA/DEX and loaded with SN-38. Three drug concentrations (0.1, 0.25 and 0.5  $\mu\text{M}$ ) and three time points (24, 48 and 120 h) were considered. The drug concentration points correspond to NP amounts ranging from 24 to 200  $\mu\text{g}$ .

**Table S1.** Estimated NPs concentration ( $\mu\text{g/mL}$ ) corresponding to DOXO concentrations of 1, 2, and 4  $\mu\text{M}$  and SN-38 concentrations of 100, 200, and 500 nM.

| DOXO       |                 |                 |                 |
|------------|-----------------|-----------------|-----------------|
| Surfactant | 1 $\mu\text{M}$ | 2 $\mu\text{M}$ | 4 $\mu\text{M}$ |
| PVA        | 50              | 100             | 200             |
| DEX        | 25              | 50              | 100             |
| PVA/DEX    | 28              | 56              | 112             |
| SN-38      |                 |                 |                 |
| Surfactant | 100 nM          | 200 nM          | 500 nM          |
| PVA        | 24              | 48              | 120             |
| DEX        | 20              | 40              | 100             |
| PVA/DEX    | 40              | 80              | 200             |

**Table S2.** IC<sub>50</sub> values of either empty or loaded NPs referred to the mass of nanoparticle (μg) needed to kill 50% of treated cells. The data have been determined after 72 h (in the case of DOXO) and 120 h (in the case of SN-38) incubation with MCF-7 cells. In each pair of samples (empty versus loaded NPs) the difference between the IC<sub>50</sub> values is statistically significant ( $p < 0.01$ ).

| 72 h incubation   | IC 50 (μg NP) | 120 h incubation   | IC 50 (μg NP) |
|-------------------|---------------|--------------------|---------------|
| PVA               | 612 ± 53      | PVA                | 454 ± 49      |
| PVA with DOXO     | 164 ± 8       | PVA with SN-38     | 107 ± 21      |
| PVA/DEX           | 480 ± 24      | PVA/DEX            | 450 ± 35      |
| PVA/DEX with DOXO | 51 ± 5        | PVA/DEX with SN-38 | 89 ± 7        |
| DEX               | 397 ± 36      | DEX                | 349 ± 47      |
| DEX with DOXO     | 79 ± 6        | DEX with SN-38     | 82 ± 8        |
